# Supplementary material
Source: PubMed Central journal article supplement (PMC4097884)
Supplement: NIHMS587594-supplement-1.pdf [file NIHMS587594-supplement-1.pdf]

**FIGURE S1.** CDR3 $\alpha$  Sequences alone can alter the interaction of TCR $\beta$  residues with MHC. (A-C) The energetic contribution of peptide and MHC side chains for the V $\alpha$ 2.8<sup>+</sup> V $\beta$ 8.2<sup>+</sup> (A) J809.B5, (B) J809.H1 and (C) 14.C6 TCRs binding to IA<sup>b</sup>-3K. Each TCR carries the identical TCR $\beta$  sequence. Data in (A, B) has been previously published (25) and is shown for comparison to the 14.C6 interaction with IA<sup>b</sup>-3K. See Supplementary Table S1 for values for TCR interactions with individual pMHC residues. (D-O) Binding of Soluble (D, G, J and M) J809.B5 TCR, (E, H, K, N) J809.H1 or (F, I, L, O) 14.C6 TCRs were analyzed for equilibrium affinity binding to immobilized (D-F) IA<sup>b</sup>-3K, (G-I) IA<sup>b</sup>-3K which carries an alanine substitution at the IA<sup>b</sup>  $\alpha$ -chain residue K39 (K39A), (J-L) IA<sup>b</sup>-3K which carries an alanine substitution at the IA<sup>b</sup>  $\alpha$ -chain residue Q57 (Q57A), or (M-O) IA<sup>b</sup>-3K which carries an alanine substitution at the IA<sup>b</sup>  $\alpha$ -chain residue Q61 (Q61A) via SPR. Listed K<sub>D</sub> are the average of three independent experiments, sensograms are representative analyses.

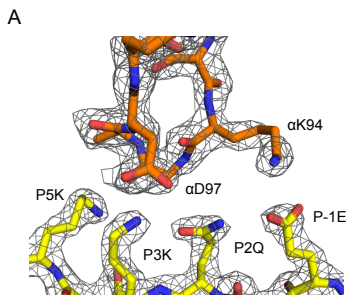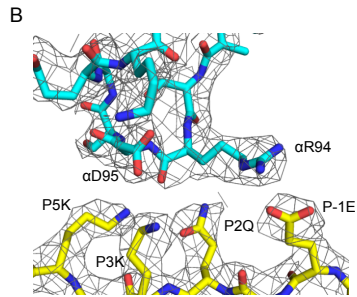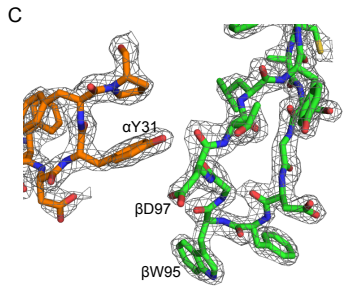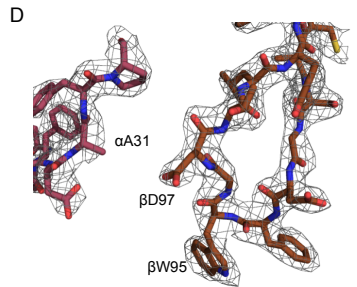

**E. J809.B5:IA<sup>b</sup>-3K PDB:4P23**

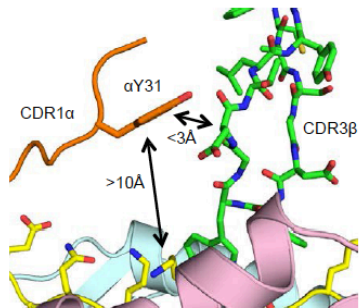

**F. 14.C6:IA<sup>b</sup>-3K PDB:4P5T**

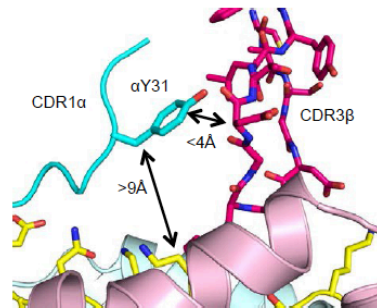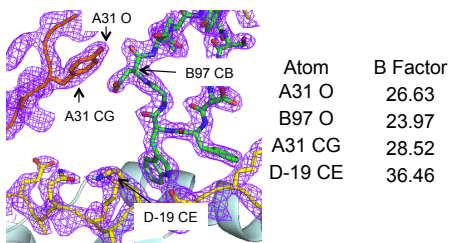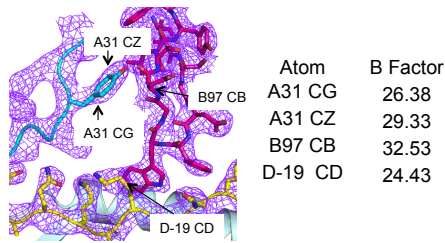

**G. 172.10:IA<sup>u</sup>-MBP PDB:1UH3**

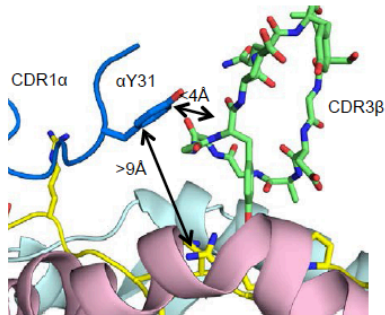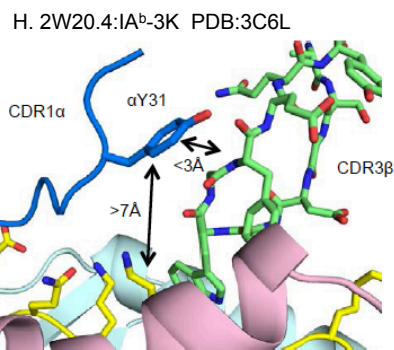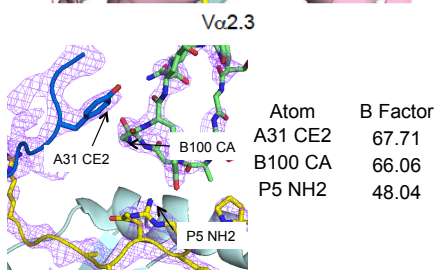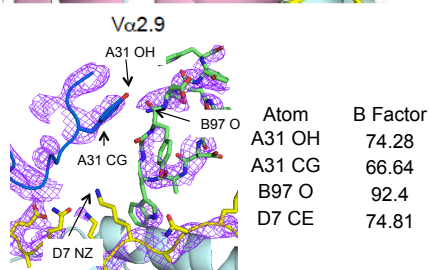

**FIGURE S2.** Example of electron density for J809.B5, 14.C6 and J809.B5 Y31A TCRs bound to IA<sup>b</sup>-3K, and the Relative Positioning of CDR1 $\alpha$  residue Y31 to CDR3 $\beta$  loops in several crystal structure of V $\alpha$ 2<sup>+</sup> TCRs bound to pMHC ligands. Electron density was contoured at 1.5 sigma from  $|2F_{\text{obs}}-F_{\text{calc}}|/a_{\text{calc}}$  map (grey) calculated from portions of the models. (A) J809.B5 CDR3 $\alpha$  loop and 3K peptide with IA<sup>b</sup>  $\alpha\beta$  chains omitted. (B) J809.B5 CDR1 $\alpha$  and CDR3 $\beta$  loops (C) 14.C6 CDR3 $\alpha$  loop and 3K peptide with IA<sup>b</sup>  $\alpha\beta$  chains omitted (D) J809.B5 Y31A CDR1 $\alpha$  and CDR3 $\beta$  loops. J809.B5 TCR $\alpha$  chain in orange, TCR $\beta$  chain in green, 14.C6 TCR $\alpha$  chain in cyan, J809.B5 Y31A TCR $\alpha$  chain in purple, TCR $\beta$  chain in brown and the 3K peptide in yellow. (E-H) The TCR CDR1 $\alpha$  residue Y31 is positioned within 4Å of the CDR3 $\beta$  loop in several co-crystal structures of V $\alpha$ 2<sup>+</sup> TCRs bound to pMHC ligands, while being at least 7Å away from the peptide (E) J809.B5 TCR bound to IA<sup>b</sup>-3K, CDR1 $\alpha$  loop is colored orange, CDR3 $\beta$  loop is colored green; PDB code 4P23. (F) 14.C6 TCR bound to IA<sup>b</sup>-3K, CDR1 $\alpha$  loop is colored cyan, CDR3 $\beta$  loop is colored magenta; PDB code 4P5T. (G) 172.10 TCR bound to IA<sup>u</sup>-MBP, CDR1 $\alpha$  loop is colored blue, CDR3 $\beta$  loop is colored mint green. PDB code 1U3H (H) 2W1S 20.4 TCR bound to IA<sup>b</sup>-3K, CDR1 $\alpha$  loop is colored blue, CDR3 $\beta$  loop is colored mint green; PDB code 3C6L. To assess the positioning of the atoms utilized for the distance measurements between the CDR1 $\alpha$  Y31 residue and the CDR3 $\beta$  loop, as well as to the peptide, composite omit maps were generated with the CDR1 $\alpha$  loop, the CDR3 $\beta$  loop and the peptide omitted from each of the models. Fo-Fc maps for the omitted regions are shown. Clear density is observed for all CDR1 $\alpha$  Y31 side chains suggesting its position is defined by the data for all the models. Clear density is also observed for the other atoms used for the distance measurement, except for the D7 NZ atom in the peptide lysine in 36CL. However, possible alternate rotomers of the lysine side chains would still place the side chain >7Å away from the CDR1 $\alpha$  Y31 side chain suggesting that no direct contacts are formed between the Y31 residue and the peptide. The B factors associated with each atom used for the distance measurements are listed.

**Supplementary Table S1.** Primary data for 14.C6 footprint analysis

|                    | J809.B5        |     |     |     | J809.H1        |     |     |     | 14.C6          |     |     |     |
|--------------------|----------------|-----|-----|-----|----------------|-----|-----|-----|----------------|-----|-----|-----|
|                    | K <sub>d</sub> | SEM | ΔΔG | SEM | K <sub>d</sub> | SEM | ΔΔG | SEM | K <sub>d</sub> | SEM | ΔΔG | SEM |
| IA <sup>b</sup> 3K | 6              | 0.0 | 0   | 0   | 27             | 0   | 0   | 0   | 6              | 0.8 | 0.0 | 0.0 |
| αK39A              | 45             | 0.2 | 1.2 | 0   | 218            | 13  | 1.3 | 0   | 41             | 2.2 | 1.2 | 0.0 |
| αD55A              | 32             | 3.5 | 1   | 0.1 | 219            | 10  | 1.3 | 0   | 17             | 6.7 | 0.5 | 0.2 |
| αQ57A              | 31             | 4.6 | 0.9 | 0.1 | 26             | 0.1 | 0   | 0   | 6              | 0.6 | 0.0 | 0.0 |
| αL60A              | 30             | 5.1 | 0.9 | 0.1 | 137            | 22  | 0.9 | 0.1 | 33             | 5.1 | 1.0 | 0.1 |
| αQ61A              | 151            | 0.0 | 1.9 | 0   | 35             | 3.1 | 0.1 | 0   | 6              | 0.8 | 0.0 | 0.0 |
| αN62A              | 77             | 0.1 | 1.5 | 0   | 238            | 12  | 1.3 | 0   | 75             | 2.2 | 1.3 | 0.1 |
| αV65A              | 43             | 1.7 | 1.1 | 0   | 73             | 13  | 0.6 | 0.1 | 26             | 6.2 | 0.8 | 0.2 |
| αK67A              | 19             | 3.3 | 0.7 | 0.1 | 84             | 10  | 0.7 | 0.1 | 32             | 5.1 | 1.0 | 0.1 |
| αH68A              | 17             | 3.1 | 0.6 | 0.1 | 85             | 8.4 | 0.7 | 0   | 33             | 5.0 | 1.0 | 0.1 |
| αV72A              | 6              | 0.2 | 0   | 0   | 28             | 0.6 | 0   | 0   | 6              | 0.8 | 0.0 | 0.0 |
| αK75A              | 8              | 0.5 | 0.2 | 0   | 34             | 2.2 | 0.1 | 0   | 11             | 3.7 | 0.3 | 0.2 |
| P-2A               | 6              | 0.5 | 0   | 0   | 26             | 0.4 | 0   | 0   | 6              | 0.6 | 0.0 | 0.0 |
| P-1A               | 43             | 0.7 | 1.1 | 0   | 284            | 10  | 1.4 | 0   | 36             | 4.4 | 1.0 | 0.1 |
| P2A                | 19             | 4.2 | 0.6 | 0.1 | 249            | 13  | 1.3 | 0   | 98             | 2.9 | 1.8 | 0.0 |
| P3A                | 259            | 0.0 | 2.2 | 0   | 240            | 13  | 1.3 | 0   | 173            | 3.4 | 2.1 | 0.0 |
| P5A                | 458            | 0.0 | 2.5 | 0   | 177            | 16  | 1.1 | 0.1 | 82             | 2.5 | 1.7 | 0.0 |
| P7A                | 6              | 0.1 | 0   | 0   | 27             | 0.5 | 0   | 0   | 6              | 0.7 | 0.0 | 0.0 |
| P8A                | 7              | 0.6 | 0.1 | 0   | 31             | 1.7 | 0.1 | 0   | 9              | 2.3 | 0.2 | 0.1 |
| P10A               | 6              | 0.2 | 0   | 0   | 28             | 0.4 | 0   | 0   | 7              | 1.0 | 0.0 | 0.0 |
| P11A               | 8              | 0.7 | 0.1 | 0   | 28             | 1   | 0   | 0   | 6              | 0.7 | 0.0 | 0.0 |
| βE59A              | 7              | 0.9 | 0.1 | 0.1 | 31             | 2.3 | 0.1 | 0   | 9              | 2.5 | 0.2 | 0.1 |
| βY60A              | 9              | 1.3 | 0.2 | 0.1 | 31             | 1.3 | 0.1 | 0   | 8              | 1.3 | 0.1 | 0.1 |
| βS63A              | 6              | 0.5 | 0   | 0   | 27             | 0.7 | 0   | 0   | 6              | 0.7 | 0.0 | 0.0 |
| βQ64A              | 8              | 0.8 | 0.1 | 0.1 | 30             | 1.4 | 0.1 | 0   | 6              | 0.8 | 0.0 | 0.0 |
| βP65A              | 7              | 1.0 | 0.1 | 0.1 | 28             | 7.8 | 0   | 0.1 | 6              | 0.6 | 0.0 | 0.0 |
| βE66A              | 8              | 0.7 | 0.1 | 0.1 | 33             | 3.8 | 0.1 | 0.1 | 17             | 6.7 | 0.5 | 0.2 |
| βI67A              | 8              | 1.3 | 0.2 | 0.1 | 44             | 7.4 | 0.3 | 0.1 | 7              | 0.9 | 0.0 | 0.0 |
| βE69A              | 8              | 0.9 | 0.2 | 0.1 | 65             | 11  | 0.5 | 0.1 | 33             | 5.1 | 1.0 | 0.1 |
| βR70A              | 198            | 0.0 | 2   | 0   | 294            | 12  | 1.4 | 0   | 199            | 3.5 | 2.2 | 0.1 |
| βR72A              | 7              | 0.5 | 0   | 0   | 30             | 0.3 | 0.1 | 0   | 6              | 0.6 | 0.0 | 0.0 |
| βD76A              | 7              | 0.7 | 0   | 0.1 | 27             | 1.1 | 0   | 0   | 6              | 0.6 | 0.0 | 0.0 |
| βT77A              | 6              | 0.3 | 0   | 0   | 129            | 22  | 0.5 | 0.1 | 24             | 6.6 | 0.7 | 0.2 |
| βR80A              | 7              | 0.3 | 0   | 0   | 28             | 0.5 | 0   | 0   | 6              | 0.7 | 0.0 | 0.0 |
| βH81A              | 8              | 1.4 | 0.2 | 0.1 | 123            | 16  | 0.9 | 0.1 | 23             | 6.7 | 0.7 | 0.2 |
| Eβ84A              | 7              | 0.5 | 0.1 | 0   | 32             | 2.5 | 0.1 | 0   | 6              | 0.8 | 0.0 | 0.0 |

Relative equilibrium affinities (K<sub>d</sub>) and change in Gibbs free energy (ΔΔG) for J809.B5, J809.H1 and 14.C6 TCRs binding alanine substituted I-A<sup>b</sup> 3K complexes. For each value the associated standard error of the mean (sem) is also reported. Data for the J809.B5 and J809.H1 TCRs has been reported previously in (Stadinski et al., 2011).

**Table S2.** EC<sub>50</sub> values for T cells and peptides analyzed in this study

| <u>T cell</u>  | <u>Peptide</u> | <u>MHC</u>            | <u>EC<sub>50</sub> ng/ml</u> | <u>SEM</u> |
|----------------|----------------|-----------------------|------------------------------|------------|
| J809.B5        | 3K             | IA <sup>b</sup>       | 2                            | 0.4        |
| J809.B5        | FMRKA          | IA <sup>b</sup>       | > 100,000                    | 0          |
| J809.B5 αY31A  | 3K             | IA <sup>b</sup>       | 312                          | 121        |
| J809.B5 αY31A  | FMRKA          | IA <sup>b</sup>       | 1679                         | 138        |
| J809.B5 βN29A  | 3K             | IA <sup>b</sup>       | 58                           | 19         |
| J809.B5 βY46A  | 3K             | IA <sup>b</sup>       | 2107                         | 120        |
| J809.B5 βY848A | 3K             | IA <sup>b</sup>       | > 100,000                    | NA         |
| J809.B5 βE54A  | 3K             | IA <sup>b</sup>       | > 100,000                    | NA         |
| J809.B5        | 3K             | IA <sup>b</sup> αK39A | > 100,000                    | NA         |
| J809.B5        | 3K             | IA <sup>b</sup> αQ57A | 376                          | 164        |
| J809.B5        | 3K             | IA <sup>b</sup> αQ61A | > 100,000                    | NA         |
| J809.H1        | 3K             | IA <sup>b</sup>       | 12                           | 5          |
| J809.H1        | RCKST          | IA <sup>b</sup>       | 3340                         | 2577       |
| J809.H1 αY31A  | 3K             | IA <sup>b</sup>       | 1                            | 0          |
| J809.H1 αY31A  | RCKST          | IA <sup>b</sup>       | 4258                         | 1487       |
| J809.H1 βN29A  | 3K             | IA <sup>b</sup>       | > 100,000                    | NA         |
| J809.H1 βY46A  | 3K             | IA <sup>b</sup>       | 66                           | 1          |
| J809.H1 βY848A | 3K             | IA <sup>b</sup>       | > 100,000                    | NA         |
| J809.H1 βE54A  | 3K             | IA <sup>b</sup>       | 2916                         | 0          |
| J809.H1        | 3K             | IA <sup>b</sup> αK39A | 38,000                       | 2,300      |
| J809.H1        | 3K             | IA <sup>b</sup> αQ57A | 0.3                          | 0.2        |
| J809.H1        | 3K             | IA <sup>b</sup> αQ61A | 0.5                          | 0.2        |
| 14.C6          | 3K             | IA <sup>b</sup>       | 1                            | 1          |
| 14.C6          | QKKLK          | IA <sup>b</sup>       | 70                           | 15         |
| 14.C6 αY31A    | 3K             | IA <sup>b</sup>       | 0.8                          | 0.5        |
| 14.C6 αY31A    | QKKLK          | IA <sup>b</sup>       | 3                            | 2          |
| 14.C6 βN29A    | 3K             | IA <sup>b</sup>       | 49                           | 14         |
| 14.C6 βY46A    | 3K             | IA <sup>b</sup>       | 1                            | 1          |
| 14.C6 βY848A   | 3K             | IA <sup>b</sup>       | 76                           | 4          |
| 14.C6 βE54A    | 3K             | IA <sup>b</sup>       | 1                            | 0          |
| 14.C6          | 3K             | IA <sup>b</sup> αK39A | 7.9                          | 1.4        |
| 14.C6          | 3K             | IA <sup>b</sup> αQ57A | 0.2                          | 0.004      |
| 14.C6          | 3K             | IA <sup>b</sup> αQ61A | 0.5                          | 0.15       |
| J809.G3        | 3K             | IA <sup>b</sup>       | 1                            | 0          |
| J809.G3 αY31A  | 3K             | IA <sup>b</sup>       | > 100,000                    | NA         |
| J809.G3        | YTRRT          | IA <sup>b</sup>       | 3532                         | 1469       |
| J809.G3 αY31A  | YTRRT          | IA <sup>b</sup>       | 4254                         | 2167       |
| 13.B1          | 3K             | IA <sup>b</sup>       | 12                           | 5          |
| 13.B1 αY31A    | 3K             | IA <sup>b</sup>       | 964                          | 346        |
| 13.B1          | SKKRP          | IA <sup>b</sup>       | 40764                        | 26032      |
| 13.B1 αY31A    | SKKRP          | IA <sup>b</sup>       | 289                          | 100        |
| 13.D5          | 3K             | IA <sup>b</sup>       | 153833                       | 8268       |
| 13.D5 αY31A    | 3K             | IA <sup>b</sup>       | 20151                        | 13348      |
| 13.D5          | YTRRT          | IA <sup>b</sup>       | 5958                         | 3577       |
| 13.D5 αY31A    | YTRRT          | IA <sup>b</sup>       | 3637                         | 1284       |
| 14.A6          | 3K             | IA <sup>b</sup>       | 10                           | 4          |
| 14.A6 αY31A    | 3K             | IA <sup>b</sup>       | 9                            | 7          |
| 14.A6          | SKKRP          | IA <sup>b</sup>       | 217600                       |            |
| 14.A6 αY31A    | SKKRP          | IA <sup>b</sup>       | 1222                         | 452        |
